# Supplementary material
Source: HighWire-hosted journal article supplement (doi:10.1101/rna.042911.113)

## Supplementary Data

Array features and binding curves for compounds **2-12**. For each compound, its array feature and the surrounding six features are shown for arrays treated with RNA I and RNA II. The array feature of the hit compound is the center feature. A grid of circles is overlaid on each scan to indicate the pattern of spotting. Each circle corresponds to an area with diameter of 150  $\mu\text{m}$ .

A representative binding curve for each compound with RNAs I and II is shown with the  $\text{EC}_{50}$  for that experiment. Binding was monitored by fluorescence of 2-aminopurine as described in Materials and Methods. The error bars are the standard deviation of six replicate measurements for each concentration. The reported  $K_d$ s are the means of three independently measured  $\text{EC}_{50}$ s.

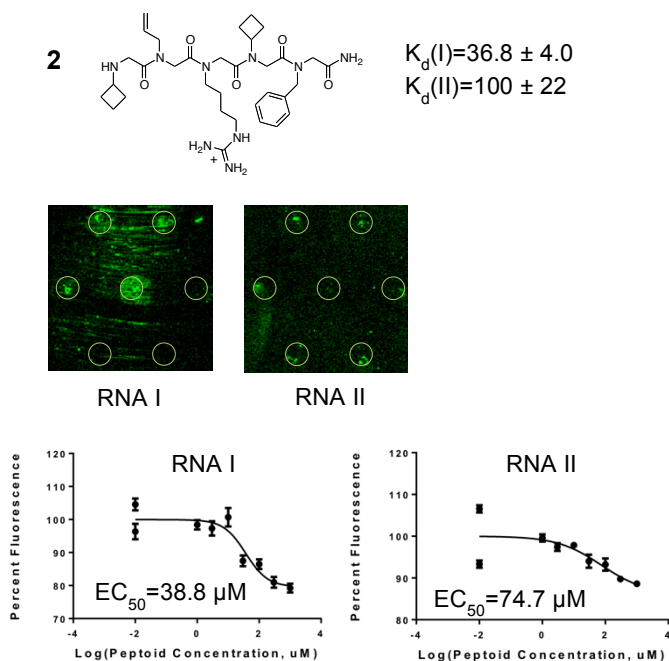

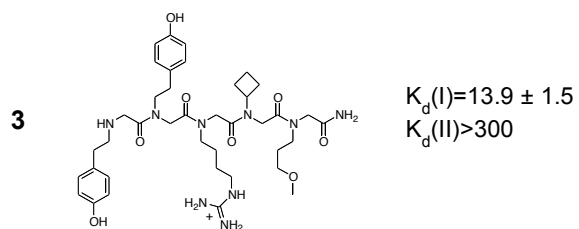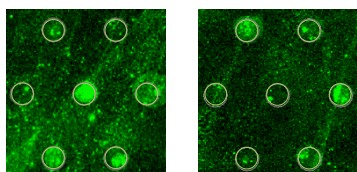

RNA I

RNA II

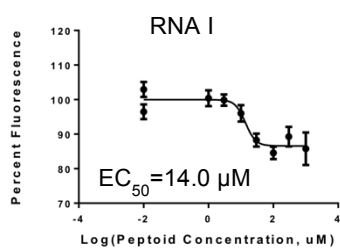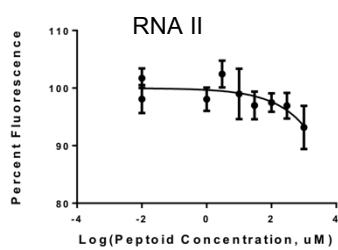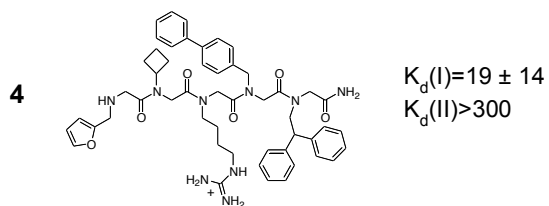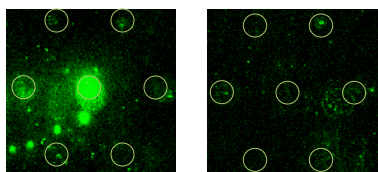

RNA I

RNA II

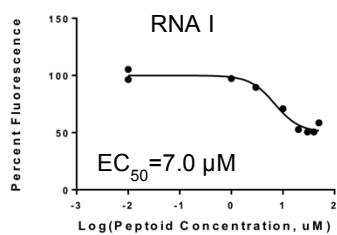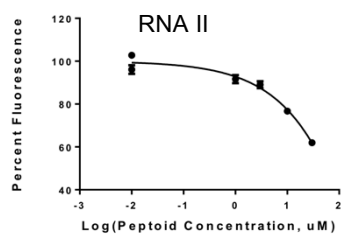

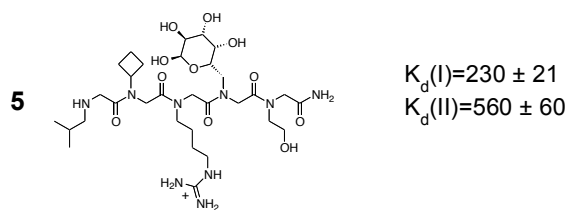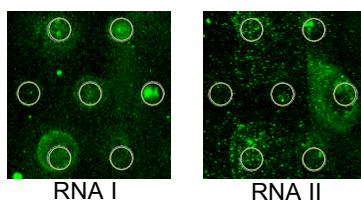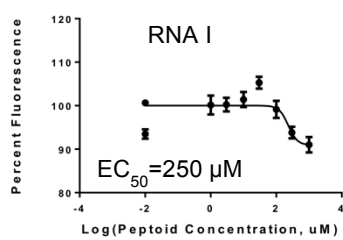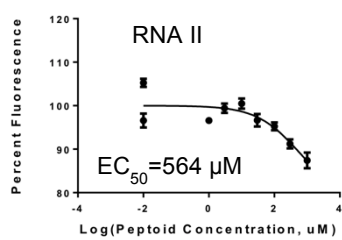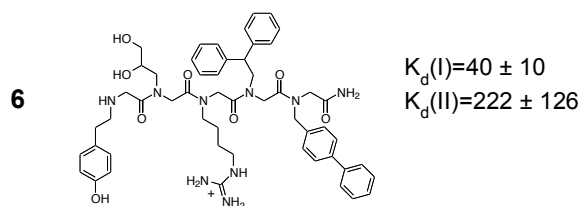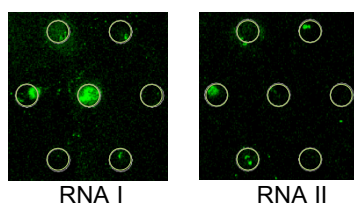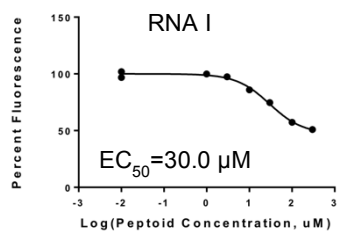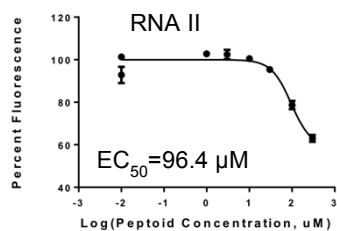



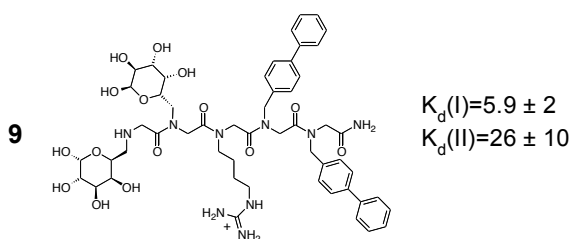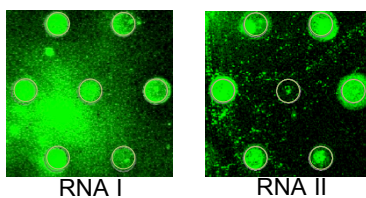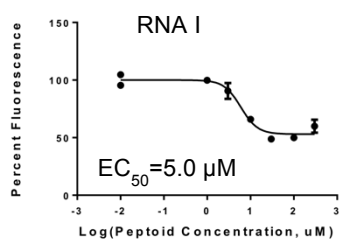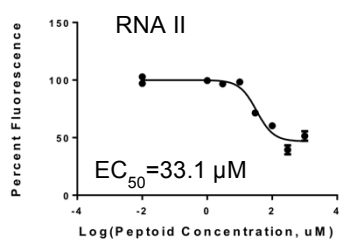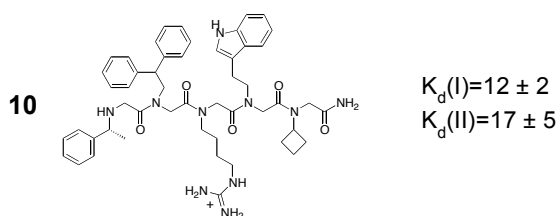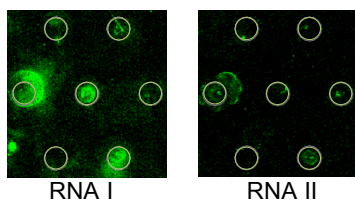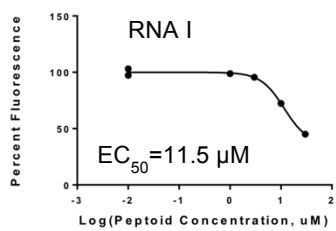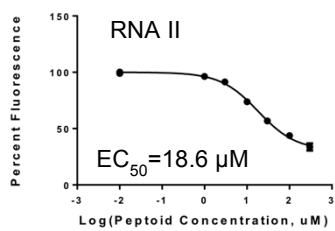

Supplement: SuppMaterial.pdf [file SuppMaterial.pdf]
